# Supplementary material for: Antioxidant Phytocomplexes Extracted from Pomegranate (Punica granatum L.) Using Hydrodynamic Cavitation Show Potential Anticancer Activity In Vitro
Source: MDPI journal article supplement (doi:10.3390/antiox12081560), 2023-08-04
Supplement: s1 [file s1]

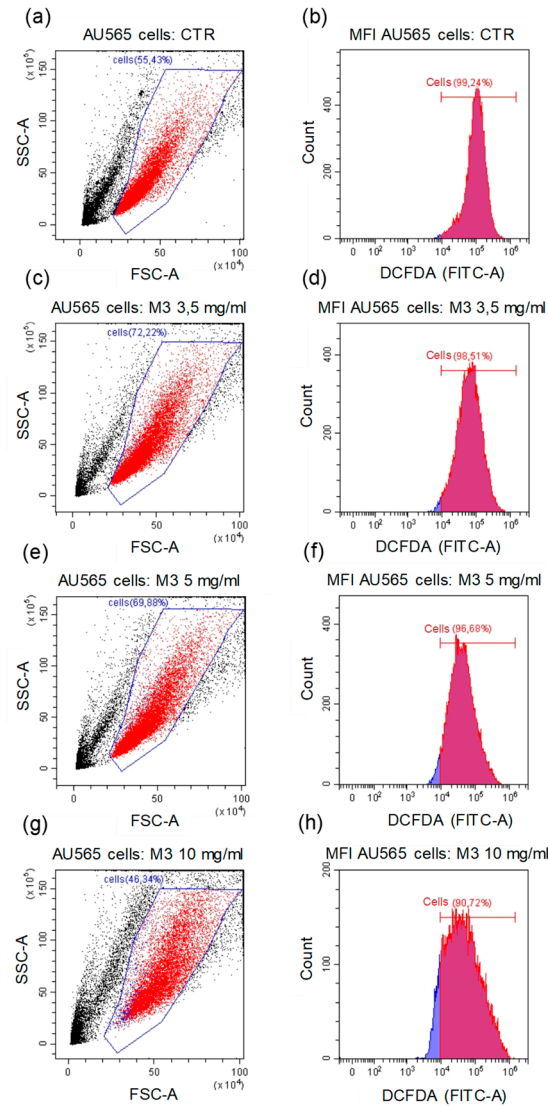

**Figure S1.** Gating strategy by flow cytometry to assess the reactive oxygen species in AU565 treated with M3 extracts. Representation of the distribution of AU565 alive cells by scatter plot (FSC *vs* SSC): (a) CTR; (c) M3 extract 3.5 mg/mL; (e) M3 extract 5 mg/mL; (g) M3 extract 10 mg/mL. Representative histogram of mean fluorescence intensity (MFI) of DCFDA (FITC-A) to assess reactive oxygen

species (ROS) in AU565 alive cells: **(b)** CTR; **(d)** M3 extract 3.5 mg/mL; **(f)** M3 extract 5 mg/mL; **(h)** M3 extract 10 mg/mL. The representations shown are of a representative experiment of three performed.

**Table S1. Secondary metabolites in pomegranate samples.** The content of total phenols, flavonoids, and tannins of M1-M5 fractions from crude, lyophilized and aqueous pomegranate extracts obtained by spectrophotometric analysis was reported. The mean values (n=3) are to be considered as  $\mu\text{g GAE/mg FW}$  for phenolics,  $\mu\text{g QE/mg FW}$  for flavonoids,  $\mu\text{g CE/mg FW}$  for tannins, and  $\mu\text{g}$  of each anthocyanin/mg FW for anthocyanins. Legend: SD, Standard Deviation; Pg3G, Pelargonidin 3-glucoside; Pt3G, Petunidin 3-glucoside.

| Samples     |    | Phenolics |       | Flavonoids |       | Tannins |       | Anthocyanins |       |             |       |       |       |          |       |          |       |              |       |       |       |
|-------------|----|-----------|-------|------------|-------|---------|-------|--------------|-------|-------------|-------|-------|-------|----------|-------|----------|-------|--------------|-------|-------|-------|
|             |    | Mean      | SD    | Mean       | SD    | Mean    | SD    | Cyanidin     |       | Delphinidin |       | Pg3G  |       | Peonidin |       | Malvidin |       | Pelargonidin |       | Pt3G  |       |
|             |    |           |       |            |       |         |       | Mean         | SD    | Mean        | SD    | Mean  | SD    | Mean     | SD    | Mean     | SD    | Mean         | SD    | Mean  | SD    |
| Crude       | M1 | 0.162     | 0.014 | 2.123      | 0.056 | 0.378   | 0.026 | 0.161        | 0.010 | 0.120       | 0.007 | 0.326 | 0.010 | 0.111    | 0.002 | 0.060    | 0.005 | 0.198        | 0.008 | 0.372 | 0.019 |
|             | M2 | 0.216     | 0.021 | 2.403      | 0.045 | 0.415   | 0.021 | 0.214        | 0.013 | 0.156       | 0.005 | 0.426 | 0.013 | 0.146    | 0.004 | 0.074    | 0.002 | 0.261        | 0.010 | 0.473 | 0.028 |
|             | M3 | 0.211     | 0.042 | 2.638      | 0.062 | 0.401   | 0.024 | 0.227        | 0.005 | 0.176       | 0.012 | 0.448 | 0.027 | 0.157    | 0.006 | 0.087    | 0.003 | 0.284        | 0.017 | 0.516 | 0.021 |
|             | M4 | 0.191     | 0.014 | 2.702      | 0.085 | 0.490   | 0.025 | 0.244        | 0.010 | 0.185       | 0.011 | 0.464 | 0.019 | 0.154    | 0.006 | 0.094    | 0.004 | 0.280        | 0.020 | 0.524 | 0.029 |
|             | M5 | 0.201     | 0.028 | 2.806      | 0.017 | 0.402   | 0.016 | 0.221        | 0.013 | 0.170       | 0.009 | 0.421 | 0.029 | 0.154    | 0.009 | 0.086    | 0.005 | 0.250        | 0.017 | 0.499 | 0.035 |
| Lyophilized | M1 | 0.206     | 0.021 | 2.195      | 0.395 | 0.392   | 0.020 | 0.091        | 0.005 | 0.073       | 0.004 | 0.156 | 0.012 | 0.061    | 0.004 | 0.027    | 0.001 | 0.102        | 0.006 | 0.216 | 0.009 |
|             | M2 | 0.269     | 0.019 | 2.243      | 0.079 | 0.398   | 0.024 | 0.170        | 0.009 | 0.124       | 0.009 | 0.348 | 0.028 | 0.120    | 0.007 | 0.048    | 0.003 | 0.218        | 0.015 | 0.380 | 0.023 |
|             | M3 | 0.387     | 0.208 | 2.746      | 0.023 | 0.384   | 0.019 | 0.221        | 0.018 | 0.162       | 0.006 | 0.160 | 0.003 | 0.152    | 0.006 | 0.076    | 0.005 | 0.274        | 0.022 | 0.499 | 0.015 |
|             | M4 | 0.255     | 0.021 | 2.630      | 0.085 | 0.379   | 0.015 | 0.220        | 0.009 | 0.163       | 0.008 | 0.454 | 0.018 | 0.157    | 0.006 | 0.077    | 0.003 | 0.279        | 0.006 | 0.507 | 0.041 |
|             | M5 | 0.196     | 0.021 | 2.890      | 0.034 | 0.366   | 0.011 | 0.186        | 0.009 | 0.144       | 0.012 | 0.361 | 0.018 | 0.127    | 0.010 | 0.071    | 0.004 | 0.244        | 0.007 | 0.427 | 0.026 |
| Aqueous     | M1 | 0.080     | 0.017 | 1.756      | 0.099 | 0.661   | 0.040 | 0.005        | 0.000 | 0.178       | 0.007 | 0.527 | 0.042 | 0.182    | 0.011 | 0.038    | 0.003 | 0.330        | 0.010 | 0.528 | 0.037 |

|  |    |       |       |       |       |       |       |       |       |       |       |       |       |       |       |       |       |       |       |       |       |
|--|----|-------|-------|-------|-------|-------|-------|-------|-------|-------|-------|-------|-------|-------|-------|-------|-------|-------|-------|-------|-------|
|  | M2 | 0.129 | 0.009 | 1.931 | 0.021 | 0.551 | 0.028 | 0.282 | 0.020 | 0.189 | 0.013 | 0.550 | 0.022 | 0.196 | 0.016 | 0.044 | 0.002 | 0.362 | 0.011 | 0.597 | 0.018 |
|  | M3 | 0.129 | 0.004 | 2.175 | 0.028 | 0.677 | 0.047 | 0.129 | 0.006 | 0.218 | 0.011 | 0.619 | 0.025 | 0.216 | 0.006 | 0.048 | 0.004 | 0.397 | 0.020 | 0.655 | 0.026 |
|  | M4 | 0.153 | 0.004 | 2.410 | 0.120 | 0.719 | 0.022 | 0.338 | 0.014 | 0.233 | 0.009 | 0.637 | 0.038 | 0.229 | 0.009 | 0.051 | 0.002 | 0.425 | 0.026 | 0.687 | 0.034 |
|  | M5 | 0.153 | 0.009 | 2.210 | 0.035 | 0.722 | 0.036 | 0.287 | 0.011 | 0.193 | 0.012 | 0.579 | 0.041 | 0.197 | 0.008 | 0.038 | 0.002 | 0.359 | 0.022 | 0.613 | 0.025 |

**Table S2. Phenolic and flavonoid compounds detected in pomegranate extracts by HPLC-DAD.** Concentrations of secondary metabolites present in the fractions (M1-M5) of the crude, lyophilized and aqueous extracts were reported. Results were expressed as µg per mg of plant fresh weight.

| EXTRACT     | FRACTION | Mean/Standard deviation | Gallic acid | 3-Hydroxytyrosol | Vanillic acid | Epicatechin | Rosmarinic acid | 4-Hydroxybenzoic acid | Chlorogenic acid | Caffeic acid | Syringic acid | <i>p</i> -Coumaric acid | Resveratrol | Salicylic acid | Quercetin-3-O-glucoside | Myricetin | Quercetin | 5,7-Dimethoxycoumarin | Genistein | Kaempferol | 1,1-Dimethylallyl caffeate | Chrysin | Caffeic acid phenethyl ester |
|-------------|----------|-------------------------|-------------|------------------|---------------|-------------|-----------------|-----------------------|------------------|--------------|---------------|-------------------------|-------------|----------------|-------------------------|-----------|-----------|-----------------------|-----------|------------|----------------------------|---------|------------------------------|
| CRUDE       | M1       | Mean                    | 0.00        | 451.70           | 51.91         | 384.87      | 1.93            | 61.67                 | 208.75           | 23.37        | 32.45         | 12.95                   | 48.84       | 120.00         | 155.96                  | 4.88      | 0.74      | 0.00                  | 0.00      | 0.32       | 0.00                       | 0.00    | 0.00                         |
|             |          | Std Dv                  | 0.00        | 27.10            | 3.11          | 15.39       | 0.15            | 4.93                  | 16.70            | 1.87         | 0.97          | 0.52                    | 2.93        | 8.40           | 6.24                    | 0.24      | 0.04      | 0.00                  | 0.00      | 0.02       | 0.00                       | 0.00    | 0.00                         |
|             | M2       | Mean                    | 0.00        | 478.89           | 58.92         | 576.77      | 2.24            | 68.70                 | 263.73           | 26.53        | 40.50         | 16.50                   | 66.25       | 188.72         | 215.92                  | 5.66      | 0.17      | 0.00                  | 0.00      | 0.25       | 0.00                       | 0.00    | 0.00                         |
|             |          | Std Dv                  | 0.00        | 28.73            | 4.12          | 34.61       | 0.09            | 2.75                  | 15.82            | 1.59         | 1.22          | 0.50                    | 1.32        | 7.55           | 8.64                    | 0.34      | 0.01      | 0.00                  | 0.00      | 0.02       | 0.00                       | 0.00    | 0.00                         |
|             | M3       | Mean                    | 0.00        | 542.42           | 65.20         | 606.15      | 1.05            | 83.38                 | 142.65           | 29.36        | 45.35         | 17.62                   | 71.51       | 176.88         | 223.11                  | 2.66      | 0.39      | 0.00                  | 0.00      | 0.37       | 0.00                       | 0.00    | 0.13                         |
|             |          | Std Dv                  | 0.00        | 37.97            | 4.56          | 18.18       | 0.03            | 4.17                  | 5.71             | 1.17         | 1.81          | 1.06                    | 4.29        | 10.61          | 13.39                   | 0.11      | 0.01      | 0.00                  | 0.00      | 0.03       | 0.00                       | 0.00    | 0.01                         |
|             | M4       | Mean                    | 0.00        | 556.45           | 33.47         | 292.41      | 2.40            | 129.56                | 95.30            | 15.07        | 5.21          | 3.12                    | 18.53       | 162.99         | 182.96                  | 6.07      | 0.14      | 0.26                  | 0.00      | 0.38       | 0.00                       | 0.00    | 0.29                         |
|             |          | Std Dv                  | 0.00        | 33.39            | 2.01          | 20.47       | 0.17            | 5.18                  | 3.81             | 0.60         | 0.10          | 0.12                    | 1.11        | 3.26           | 12.81                   | 0.49      | 0.01      | 0.01                  | 0.00      | 0.02       | 0.00                       | 0.00    | 0.01                         |
|             | M5       | Mean                    | 0.00        | 465.07           | 34.44         | 282.96      | 2.70            | 121.13                | 100.91           | 15.51        | 5.69          | 2.98                    | 8.49        | 148.95         | 177.52                  | 6.81      | 0.14      | 0.47                  | 0.00      | 0.36       | 0.00                       | 0.00    | 0.28                         |
|             |          | Std Dv                  | 0.00        | 18.60            | 1.38          | 11.32       | 0.16            | 7.27                  | 6.05             | 0.62         | 0.23          | 0.12                    | 0.34        | 11.92          | 14.20                   | 0.54      | 0.01      | 0.01                  | 0.00      | 0.01       | 0.00                       | 0.00    | 0.01                         |
| LYOPHILIZED | M1       | Mean                    | 0.00        | 394.59           | 42.17         | 328.23      | 1.06            | 73.58                 | 81.75            | 18.99        | 27.90         | 10.70                   | 27.58       | 13.17          | 154.61                  | 2.68      | 0.25      | 0.00                  | 0.00      | 0.35       | 0.00                       | 0.00    | 0.00                         |
|             |          | Std Dv                  | 0.00        | 27.62            | 2.95          | 13.13       | 0.03            | 5.89                  | 4.91             | 0.76         | 0.84          | 0.21                    | 1.65        | 0.92           | 12.37                   | 0.11      | 0.01      | 0.00                  | 0.00      | 0.01       | 0.00                       | 0.00    | 0.00                         |
